# Supplementary material for: Molecular Study of the Amazonian Macabea Cattle History
Source: PubMed Central journal article supplement (PMC5077120; doi:10.1371/journal.pone.0165398), 2016-10-24

$$\text{DeltaK} = \text{mean}(|L''(K)|) / \text{sd}(L(K))$$

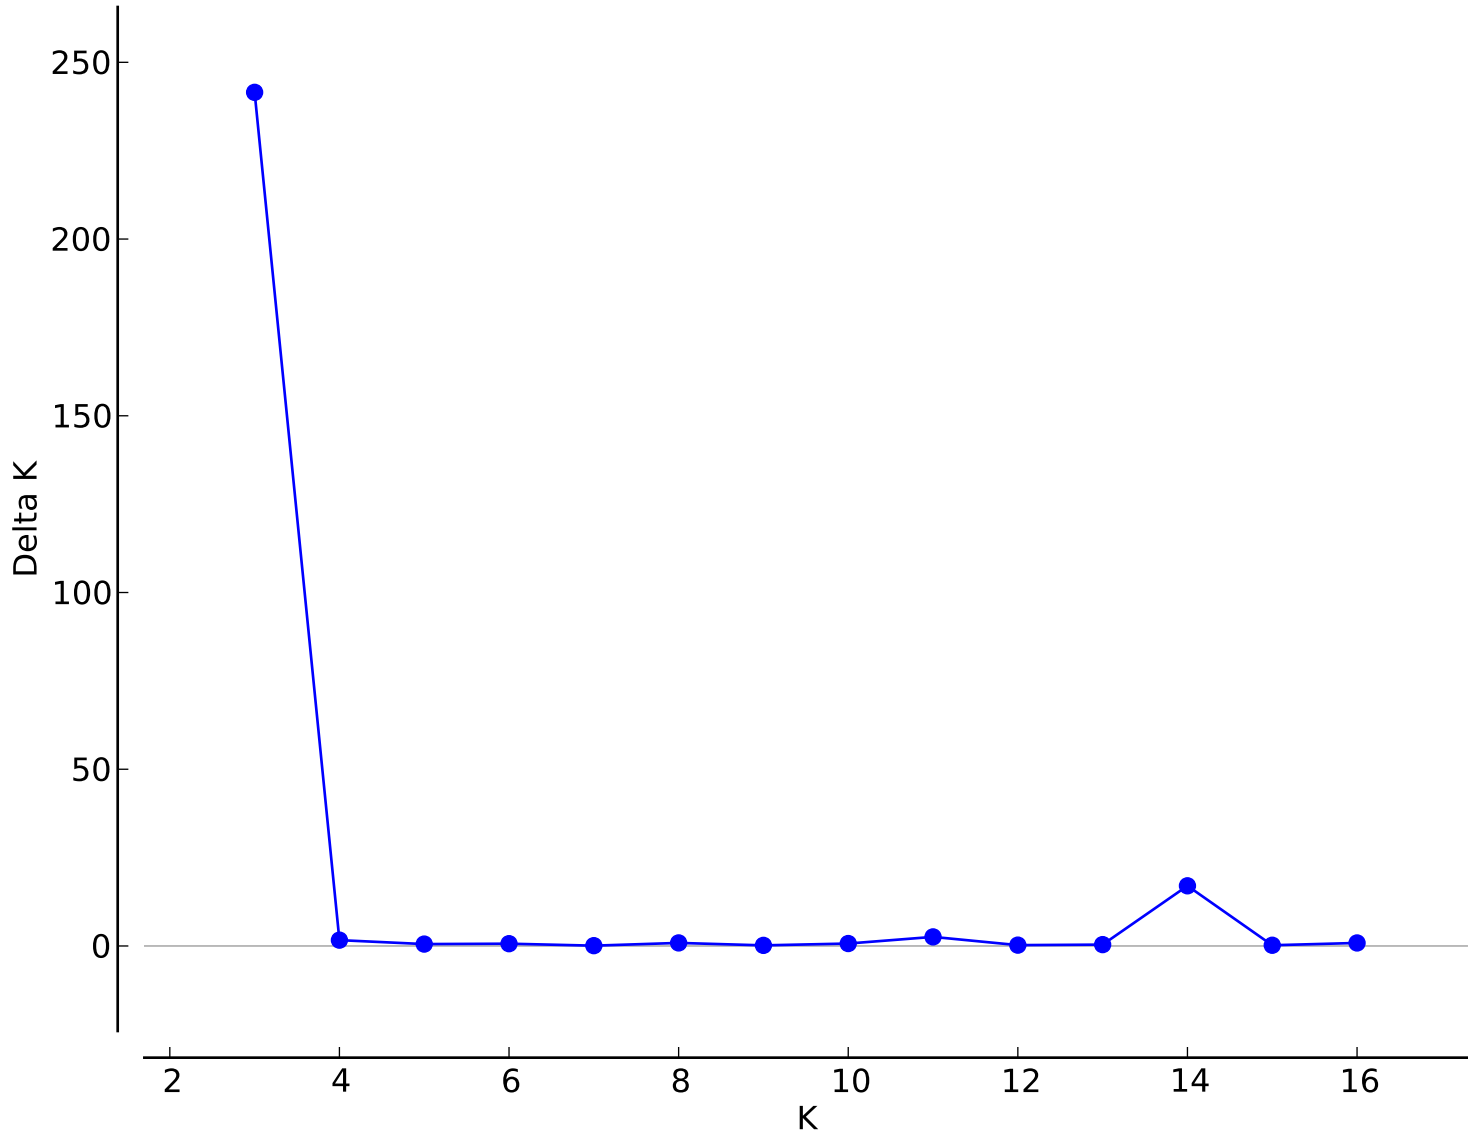

Supplement: pone.0165398.s001.pdf [file pone.0165398.s001.pdf]
